# Supplementary material for: Regional pollen-based Holocene temperature and precipitation patterns depart from the Northern Hemisphere mean trends
Source: Copernicus journal article supplement (doi:10.5194/egusphere-2022-127), 2022-04-13
Supplement: Supplementary file [file egusphere-2022-127-AC1-supplement.pdf]

# Regional pollen-based Holocene temperature and precipitation patterns depart from the Northern Hemisphere mean trends

## Response to comments of Anonymous Referee #1

### 1. General comments

**Reviewer comment: (1)** *Herzschuh and colleagues present a very nice set of Holocene pollen-based reconstructions of  $T_{ann}$ ,  $T_{July}$ , and  $P_{ann}$  from 1676 sites from the Northern Hemisphere extra-tropics in order to characterize the continental, latitudinal, and regional patterns of Holocene temperature and precipitation changes in the Northern Hemisphere extra-tropics. This synthesis study is excellent and allows for the regional heterogeneity of the temperature and precipitation trend to be mapped.*

**Response:** Thank you for this nice comment.

### 2. Major issues

#### 2.1 quality and accuracy of the datasets

**Reviewer comment: (2)** *The selection of records in the dataset for the Holocene quantitative reconstruction in this paper is unclear. The quality and accuracy of the synthesis studies depends largely on the chronological framework, archive type, sampling resolution of the original fossil pollen records, and so on. I note that those 991 records do cover the full period of 11 to 1 ka, but do not see an evaluation of the age, resolution, and archive type of the selected records. Are there any selection criteria for chronology and archive type in the dataset? For example, how many age control points does the original record contain that will be selected for quantitative reconstruction? And what is the time resolution of each sample? This takes into account that the amplitude of changes in temperature and precipitation reconstructions would vary substantially with the resolution of the proxy record.*

**Response:** This is described in Herzschuh et al. (2022b). We restructured and added additional explanations from the selection process, i.e. about archive types and chronologies to the text in the methods section.

**New text:** This study analyzes pollen-based reconstructions provided in the LegacyClimate 1.0 dataset (Herzschuh et al., 2021). It contains pollen-based reconstructions of  $T_{July}$ ,  $T_{ann}$ , and  $P_{ann}$  of 2593 records along with transfer function metadata and estimates of reconstruction errors and is accompanied by a manuscript analyzing reconstruction biases and presenting reliability tests (Herzschuh et al., 2022a). The fossil pollen records, representing the LegacyPollen 1.0 dataset, were derived from multiple natural archives, most commonly continuous lacustrine and peat accumulations (Herzschuh et al., 2022b), and originate from the Neotoma Paleoecology Database ('Neotoma' hereafter; last access: April 2021; Williams et al., 2018), a dataset from Eastern and Central Asia (Cao et al., 2013; Herzschuh et al., 2019), a dataset from Northern Asia (Cao et al., 2019), and a few additional records to fill up some spatial data gaps in Siberia.

The chronologies of LegacyPollen 1.0 are based on revised 'Bacon' (Blaauw and Christen, 2011) age-depth models with calibrated ages at each depth provided by Li et al. (2022). Taxa are harmonized to genus level for woody and major herbaceous taxa and to family level for other herbaceous taxa. Along with LegacyClimate 1.0, a taxonomically harmonized modern pollen dataset is provided (a total of

15379 samples; Herzschuh et al., 2022a) which includes datasets from Europe (EMPD2, Davis et al., 2020), Asia (Tarasov et al., 2011; Herzschuh et al., 2019; Dugerdil et al., 2021), and North America (from Neotoma; Whitmore et al., 2005). LegacyClimate 1.0 also provides the climate data for the sites of the modern pollen samples that were derived from WorldClim 2 (Fick and Hijmans, 2017).

[...]

Of the 2593 records available in LegacyClimate 1.0, 1908 records with at least 5 samples that cover at least 4000 years of the Holocene and have a mean temporal resolution of 1000 years or less were included in the time-slice comparisons based on this criterion (Fig. 1). The construction of time-series to estimate the means of climate variables was further restricted to 957 records that cover the full period of 11 to 1 ka.

**Reviewer comment: (3)** *In addition, the range and quantity of selected modern sites in the calibration dataset can also affect the accuracy of temperature and precipitation reconstructions, as suggested by the authors. Then how many transfer functions are used to calculate the 991 records in this synthesis study? Does each record need to establish a transfer function, or does it establish by region? Is the spatial range of modern sites in the calibration dataset for establishing transfer function all within a 2000 km radius? Or are there some differences in different continents or regions? Of course, I believe that the trend of paleo-temperature and paleo-precipitation change will not change substantially, but it will affect the comparison of amplitude.*

**Response:** For each record, its own calibration data set was established by including all modern samples from within a 2000 km radius around the site. This is described in the text. More details are provided in the ESSD manuscript about the LegacyClimate 1.0 dataset (Herzschuh et al., 2022a; in discussion).

**New text:** For each fossil site, we calculated the geographic distance between each modern sampling site and each fossil location and selected a unique calibration set from modern sites within a 2000 km radius (Cao et al., 2014), as it was shown to be a good trade-off between analog quality and quantity (Cao et al., 2017).

## 2.2 effect of correlation between temperature and precipitation reconstructions

**Reviewer comment: (4)** *I agree with the authors that “Pollen data are one of the few land-derived proxies available that can theoretically contain independent information on both temperature and precipitation in the same record” (Lines 99-101). Therefore, the authors reconstructed the spatio-temporal patterns of temperature and precipitation from a single dataset simultaneously. However, it is a challenge to distinguish the effect and correlation between temperature and precipitation in quantitative analysis. In the section of Methods and Discussions, the author mentions the issue of the impact of precipitation on temperature reconstruction (Lines 143-145, 410-412). Could you give more explanation as to why such an approach would ‘restrict the impact of precipitation on temperature reconstruction and vice versa’? One or two sentences will do.*

**Response:** We added some explanation in the methods section.

**New text:** A WA-PLS\_tailored reconstruction is also provided in the LegacyClimate 1.0 dataset (Herzschuh et al., 2022a), which addresses the problem that co-variation in modern temperature and precipitation data can be transferred into the reconstruction. To reduce the influence of one climate variable to the target variable, the modern range of the non-target variable is reduced by tailoring the modern pollen dataset to a selection of sites with little covariance between the two variables. For

example, to reconstruct  $T_{\text{July}}$  we identified the  $P_{\text{ann}}$  range reconstructed by WA-PLS and extended it by 25% at both ends. For the selection of sites in the modern training dataset, we then restricted modern  $P_{\text{ann}}$  to that range accordingly. As such, we keep all information for reconstruction from those modern pollen spectra that cover a wide temperature range but downweight the information from pollen spectra covering a wide precipitation range.

**Reviewer comment: (5)** *In addition, how do the effects of temperature and precipitation on each other differ across continents and regions? How is it evaluated in quantitative reconstruction analysis?*

**Response:** The effects of temperature and precipitation on each other are evaluated for each site separately, e.g. with a statistical significance test (Telford and Birks, 2011) by partialling out the explained variance in the pollen data by the respective other variables. We made assessments of the significance tests in Herzs Schuh et al. (2022a). However, the effectiveness of obtaining independent reconstructions depends on how strongly correlated temperature and precipitation are in the modern training data set.

### 2.3 reconstruction uncertainty

**Reviewer comment: (6)** *I do not see the expression of reconstruction uncertainty in Figures 2 and 5. The evaluation of the reconstruction errors is essential for quantitative reconstruction and comparisons of different results. Therefore, it would be appropriate to add each latitudinal reconstruction curve with  $1\sigma$  uncertainty shaded to the supplementary file.*

**Response:** The focus of the main text Figures 3 and 6 is on the (red) mean curves, for which we added shading corresponding to the standard error, i.e.  $\sigma/\sqrt{n}$ , on the mean of the records; the standard error is calculated taking into account the same weighting scheme as applied to calculate the mean. We follow your suggestion and provide the uncertainty ranges of all latitudinal means from records assessed in this study for the Northern Hemisphere and all (sub-)continents in the Appendix (Appendix Figures 3-7).

**Reviewer comment: (7)** *The number of records (n) for each curve in Figures 2 and 5 also needs to be displayed in the appropriate place. Is the large range of temperature and precipitation variations in North America north of 60°N caused by the number of records (n)?*

**Response:** Latitudinal curves are only shown and included in the calculation of the weighted mean curve in Figures 3 and 6, if they include more than 3 grid cells in order to reduce the influence of latitudinal bands with very few records. Labels in corresponding colors to the latitudinal curves were added to each panel in the figures to indicate the number of grid boxes that contributed to each latitudinal curve, so that the readers can bring them in relation to the variation in the curves.

### 2.4 Holocene temperature conundrum

**Reviewer comment: (8)** *There is still a great controversy regarding the occurrence of Holocene thermal maximum between the proxy temperature reconstructions and climate models, named as “Holocene temperature conundrum”. One of the main controversies for Holocene temperature conundrum is the occurrence of a maximum in mean annual temperature (MAT) during the early to middle Holocene. The term ‘mid-Holocene optimum/late-Holocene optimum’ has been used in this paper, but in some areas, such as East Asia, there is a difference between mid-Holocene optimum and Holocene warm*

*period/Holocene thermal maximum. Mid-Holocene optimum is thought to be a period of high temperature and high precipitation, when vegetation flourishes. The authors should define the mid-Holocene optimum and distinguish it from the Holocene warm period.*

**Response:** Thank you for your suggestion regarding the wording of Mid-/Late Holocene optimum. We changed the wording to “Holocene temperature maximum” and “Holocene precipitation maximum” to address the timing of the maximum values in the reconstruction and distinguish them from the Holocene warm period.

**Reviewer comment: (9)** *In addition, quantitative Holocene temperature records in East Asia (loess, lakes, marine sediments) reveal a clear early to middle Holocene thermal maximum, such as high-resolution Holocene pollen records from Xiaolongwan Maar Lake in northeastern China, Gonghai Lake in northern China, and Huguangyan Maar Lake in southern China. These records show the occurrence of a maximum in MAT during the early to middle Holocene, which does not support the conclusion of this paper that “The concept of a mid-Holocene temperature optimum only applies mainly to the mid and high northern latitudes in the circum-North Atlantic region while records from mid-latitude Asia, Western North America, and all subtropical areas do not fit into this concept but mostly show an overall Holocene increase or other pattern” (Lines 430-434).*

**Response:** Cao et al. (2017) discuss the influence of the modern pollen-climate calibration dataset extent on climate reconstructions on three pollen records from China. They conclude that a careful selection of the spatial extent of the calibration dataset has a significant influence on the reconstruction performance, i.e. that small-scale calibration datasets might not include enough spatial variation in modern pollen assemblages to cover the temporal variation of the target fossil pollen record. The selected spatial extent led to a temporal pattern in mid-latitude Asia presented in this study.

- Cao, X., Tian, F., Telford, R. J., Ni, J., Xu, Q., Chen, F., Liu, X., Stebich, M., Zhao, Y., Herzschuh, U.: Impacts of the spatial extent of pollen-climate calibration-set on the absolute values, range and trends of reconstructed Holocene precipitation. *Quaternary Science Reviews* 178, 37-53. <https://doi.org/10.1016/j.quascirev.2017.10.030>, 2017.

**New text (methods section):** For each fossil site, we calculated the geographic distance between each modern sampling site and each fossil location and selected a unique calibration set from modern sites within a 2000 km radius (Cao et al., 2014), as it was shown to be a good trade-off between analog quality and quantity (Cao et al., 2017).

**New text (discussion section):** Our pollen-based reconstructions are all performed with WA-PLS, which is known to produce smaller climate amplitudes than MAT (a likewise commonly used method) because it is less sensitive to extreme climate values in the modern pollen dataset (Birks and Simpson 2013; Cao et al., 2017; Nolan et al. 2019). Furthermore, by using a standard area size for our modern pollen datasets, we may have stabilized the regional reconstructions, that is, equalized the amplitude as the source areas represent rather similar biogeographical and climate ranges.

### 3. Minor issues

**Reviewer comment: (10)** *L202: for “in Europe north of 60°C” consider “in Europe north of 60°N”.*

**Response:** Thank you for your suggestion! This was a typo that we fixed now.

**Reviewer comment: (11)** L275: for “~0.07K compared to ~0.18K” consider “...°C compared to...”.

**Response:** We changed the unit from K to °C.

**Reviewer comment: (12)** L336: “...the modern pollen assemblages are not heavily biased by human impact”, please provide relevant literature here.

**Response:** the modern pollen assemblages are assumed to not be heavily biased by human impact, however, this is not true for all regions. We inferred the effect of human impact from the abundance of Plantaginaceae and *Rumex* as indicators of grazing and such intense animal husbandry and identified regions that are potentially biased by human influence in Herzschuh et al. (2022a) and further discussed this in the discussion section.

**New text:** As with all applications of taxa-based transfer functions to fossil records, we assume that both modern and past taxa assemblages (in our case, vegetation) are in equilibrium with climate, and that the relationships inferred from modern data do not change throughout the Holocene (Birks et al., 2010; Chevalier et al., 2020) and that the modern pollen assemblages are not heavily biased by human impact. Differences in global boundary conditions during the Early to Mid-Holocene (e.g., lower atmospheric CO<sub>2</sub> concentration, different seasonal insolation) however, may have modified these relationships, which could have also dampened the reconstructed amplitudes. Also, vegetation response to climate change may be involve lags (see the ongoing discussion about the so-called ‘forest conundrum’, i.e., the observation that observed forest maximum lags the simulated temperature maximum; Dallmeyer et al., 2022) and depends on the initial conditions such as the distribution of refugia during the Last Glacial (Herzschuh et al., 2016; 2020). Furthermore, there are areas, especially the densely settled regions in Europe and Southeastern Asia, that are affected by human activities throughout the Holocene due to intense animal husbandry, as inferred from the abundance of Plantaginaceae and *Rumex* as indicators of grazing (Herzschuh et al., 2022a), or due to industrialization since the second half of the 19<sup>th</sup> century. This probably led to extinction events, especially for disturbance-dependent taxa and contributed to gaps within the potential bioclimatic space of taxa that form natural communities (Zanon et al., 2018).

**Reviewer comment: (13)** L362: for “from the early to mid-Holocene” consider “from the middle to late-Holocene”.

**Response:** In fact, “from the early to mid-Holocene” is correct - from our reconstructions, we found a high precipitation in the Early and Mid-Holocene in East Asia (Fig. 4: %Pann 9 ka minus 6 ka). For sites in Central Asia, a decline in precipitation in the Early Holocene can be reported for 11 ka minus 9 ka (indicated by red colors). We admit that the original sentences were not clearly stated and we rephrased the paragraph to make it more clear and also point to the panels in Fig. 4 that we refer to.

**Reviewer comment: (14)** Figures 3 and 4: The map would be improved by changing some colors and size. Each 2°x2° grid cell was too small to see, even zoomed in. Changing sizes of maps and/or colors may resolve this better.

**Response:** We revised the maps in the Figures 4 and 5, made them bigger, changed the arrangement of the panels, reduced white space between the panels, removed redundant labeling and improved the color contrast (see also Reviewer comment (14) of Referee #2).
